# Supplementary material for: MiR-4649-5p acts as a tumor-suppressive microRNA in triple negative breast cancer by direct interaction with PIP5K1C, thereby potentiating growth-inhibitory effects of the AKT inhibitor capivasertib
Source: Springer Nature journal article supplement (doi:10.1186/s13058-023-01716-2), 2023-10-06
Supplement: MOESM1 [file 13058_2023_1716_MOESM1_ESM.pdf]

Supplementary Table S1: Primer sequences

| Gene    | Primer orientation | Sequence (5'→3')       |
|---------|--------------------|------------------------|
| PIP5K1C | Forward            | CGAATCGGATGACACGATGGG  |
|         | Reverse            | AAGCGCTCGGCATAGAAGC    |
| GAPDH   | Forward            | AAGGTCGGAGTCAACGGATTT  |
|         | Reverse            | ACCAGAGTTAAAAGCAGCCCTG |
| U6      | Forward            | CTCGCTTCGGCAGCACA      |
|         | Reverse            | AACGCTTCACGAATTTGCGT   |

Supplementary Table S2: Top 20 downregulated genes in miR-4649-5p mimic transfected SUM159 cells determined by RNA-seq. The genes were ranked according to log2 fold change.

| Ensembl Gene ID | Gene Name         | Log2 fold change | Adjusted p-value |
|-----------------|-------------------|------------------|------------------|
| ENSG00000130590 | <i>SAMD10</i>     | -0,996           | 0.0002234        |
| ENSG00000171992 | <i>SYNPO</i>      | -0,991           | 0.0005251        |
| ENSG00000240668 | <i>KRT8P36</i>    | -0,956           | 0.0405872        |
| ENSG00000182979 | <i>MTA1</i>       | -0,946           | 3.307e-14        |
| ENSG00000175115 | <i>PACSI</i>      | -0,941           | 0.0003574        |
| ENSG00000175221 | <i>MED16</i>      | -0,920           | 4.311e-06        |
| ENSG00000188735 | <i>TMEM120B</i>   | -0,918           | 5.985e-14        |
| ENSG00000186111 | <i>PIP5K1C</i>    | -0,916           | 0.0002384        |
| ENSG00000218175 | <i>AC016739.1</i> | -0,914           | 0.0171539        |
| ENSG00000266074 | <i>BAHCCI</i>     | -0,906           | 0.0039849        |
| ENSG00000174996 | <i>KLC2</i>       | -0,891           | 1.864e-10        |
| ENSG00000179632 | <i>MAF1</i>       | -0,832           | 3.685e-10        |
| ENSG00000135074 | <i>ADAM19</i>     | -0,830           | 0.0311261        |
| ENSG00000171246 | <i>NPTX1</i>      | -0,825           | 5.164e-22        |
| ENSG00000182158 | <i>CREB3L2</i>    | -0,797           | 2.129e-13        |
| ENSG00000126003 | <i>PLAGL2</i>     | -0,793           | 1.095e-06        |
| ENSG00000198858 | <i>R3HDM4</i>     | -0,792           | 2.122e-10        |
| ENSG00000130382 | <i>MLLT1</i>      | -0,787           | 0.0003162        |
| ENSG00000100599 | <i>RIN3</i>       | -0,787           | 0.0297205        |
| ENSG00000130734 | <i>ATG4D</i>      | -0,785           | 7.972e-07        |



|                                                             |      |    |       |      |   |          |          |
|-------------------------------------------------------------|------|----|-------|------|---|----------|----------|
| positive regulation of transcription by RNA polymerase II   | 1259 | 28 | 11,43 | 2,45 | + | 1.88E-05 | 2.27E-02 |
| positive regulation of DNA-templated transcription          | 1715 | 33 | 15,58 | 2,12 | + | 4.77E-05 | 3.40E-02 |
| positive regulation of nucleic acid-templated transcription | 1715 | 33 | 15,58 | 2,12 | + | 4.77E-05 | 3.56E-02 |
| positive regulation of RNA biosynthetic process             | 1721 | 33 | 15,63 | 2,11 | + | 4.97E-05 | 3.39E-02 |
| positive regulation of nitrogen compound metabolic process  | 3174 | 53 | 28,83 | 1,84 | + | 9.37E-06 | 2.10E-02 |
| positive regulation of metabolic process                    | 3858 | 61 | 35,04 | 1,74 | + | 7.66E-06 | 2.00E-02 |
| positive regulation of biological process                   | 6304 | 89 | 57,26 | 1,55 | + | 1.41E-06 | 1.11E-02 |
| positive regulation of macromolecule metabolic process      | 3542 | 57 | 32,17 | 1,77 | + | 9.51E-06 | 1.86E-02 |
| positive regulation of cellular biosynthetic process        | 2048 | 39 | 18,60 | 2,10 | + | 1.18E-05 | 1.86E-02 |
| positive regulation of biosynthetic process                 | 2087 | 39 | 18,96 | 2,06 | + | 1.49E-05 | 2.12E-02 |
| positive regulation of macromolecule biosynthetic process   | 1943 | 36 | 17,65 | 2,04 | + | 4.35E-05 | 3.59E-02 |
| regulation of signal transduction                           | 2989 | 50 | 27,15 | 1,84 | + | 1.52E-05 | 1.98E-02 |
| regulation of response to stimulus                          | 4034 | 60 | 36,64 | 1,64 | + | 6.02E-05 | 3.78E-02 |
| regulation of cell communication                            | 3369 | 53 | 30,60 | 1,73 | + | 4.07E-05 | 3.55E-02 |
| regulation of signaling                                     | 3381 | 54 | 30,71 | 1,76 | + | 2.55E-05 | 2.86E-02 |
| organonitrogen compound metabolic process                   | 5013 | 73 | 45,53 | 1,60 | + | 1.07E-05 | 1.86E-02 |

---

|                   |      |    |       |      |   |          |          |
|-------------------|------|----|-------|------|---|----------|----------|
| nitrogen compound | 6710 | 87 | 60,94 | 1,43 | + | 8.30E-05 | 4.82E-02 |
| metabolic process |      |    |       |      |   |          |          |

---
